# Supplementary material for: Using proteomics to advance the search for potential biomarkers for preeclampsia: A systematic review and meta-analysis
Source: PLoS One. 2019 Apr 5;14(4):e0214671. doi: 10.1371/journal.pone.0214671 (PMC6450632; doi:10.1371/journal.pone.0214671)
Supplement: S5 Table — Included in this table are the methods of validation and which proteins were validated within the eligible studies. (XLSX) [file pone.0214671.s006.xlsx]

## Sheet: S4
S5 Table. Summary of proteomic methodology and proteins validated within eligible studies. Included in this table are the methods of validation and which proteins were validated within the eligible studies.
Reference	Biological Sample	Time of collection	Depleted sample to remove high abundant proteins	Protein Identification Search engine & Version	Sequence database searched & Version	Identified differentially expressed proteins (n)	Protein validation method	Results from validation
Atkinson et al 2009	S	3T	Yes	LC-MS/MS Mascot Distiller, V2.2	Swiss-Prot V52.2	23 proteins using 2DE 63 proteins using DIGE	2-D WB, Immunoassay	Significant differences using 2-D WB: ApoE isoforms No difference using Immunoassay: ApoE and ApoC-II
Baig et al 2014	STB	3T	No	LC-MS/MS Mascot Distiller	Swiss-Prot	25	IHC	No statistical difference: Annexin A1, Annexin IV, Histone H4 and Integrin B3
Blumenstein et al 2009 (Proteomics)	P	2T	Yes	LC-MS/MS Mascot V1.6b13	IPI-Human database V3.27	36	WB	Up-regulated: Fibrinogen and a-1-antichymotrypsin No statistical difference: Gelsolin, Serum Amyloid A4, Complement 3c and Clusterin Isoform I
Blumenstein et al 2009 (Reproductive Sciences)	P	2T,3T	Yes	LC-MS/MS Mascot Distiller, V2.2	Swiss-Prot V52.2	19	WB	Down-regulated: Vitronectin No statistical difference: Highmolecular-weight Kininogen
Carty et al 2011	U	1T,3T	Yes	CE-MS	Swiss-Prot	50	ND	ND
Centlow et al 2010	PL	3T	No	MALDI-TOF MS/MS XMASS, V5	Swiss-Prot	2	IHC, WB	Up-regulated: Apolipoprotein A1
Chen et al 2011	U	NR	Yes	LC-MS/MS Protein Pilot, V3	IPI-Human database, V3.45	113	ELISA	Down-regulated: Angiotensinogen
Dai et al 2017	S	3T	Yes	LC-MS/MS Mascot	Swiss-Prot	24	ND	ND
de Groot et al 2007	TRB	3T	No	LC-MS/MS Mascot	MSDB Human database	5	IHC	Up-regulated: Calcyclin No statistical difference: Choriomammotropin
Dexlin-Mellby et al 2010	PL	3T	No	No MS	N/A	134	ELISA (multiplexed array)	Up-regulated: IL-2, IL-12, IFN-g, IL-4, IL-5, IL-6, and IL-10 No statistical difference: IL-2, IL-8, TNFa
Epiney et al 2012	CTB	3T	No	LC-MS/MS Mascot	Swiss-Prot	21	qRT-PCR	Down-regulated: Factor XIII chain A1
Erez et al 2017	P	1T,2T,3T	No	No MS	N/A	NA	ND	ND
Feng et al 2012	S	3T	No	MALDI-TOF-MS Mascot Wizard	Swiss-Prot	20	IHC, qRT-PCR	Down-regulated: Alpha 1 Antitrypsin
Gharesi-Fard et al 2010	PL	3T	No	MALDI-TOF/TOF-MS Mascot	NCBInr human database	11	ND	ND
Jia et al 2015	UCB	3T	No	LC-MS/MS Mascot V2.3.01	Swiss-Prot	29	ND	ND
Jin et al 2008	CTB	3T	No	LC-MS/MS Mascot	IPI-Human V3.25	13	WB	Up-regulated: Heat Shock Protein 27
Jin et al 2017	CTB	3T	No	LC-MS/MS MaxQuant V1.5.1.2	Swiss-Prot	145	ELISA, WB, IHC	Up-regulated: GCLM, GGCT, GSTK1, SMS, SOD1, KFkB Down-regulated: GPX1, GPX3, GSTT2
Johnstone et al 2011	P	3T	No	LC-MS/MS Mascot	CNBlnr & Swiss-Prot	12	WB	Down-regulated: glutathione S-transferase, Heat Shock Protein 60, beta-tubulin, and ezrin
Kim et al 2007	P	3T	No	MALDI-TOF MS/MS Mascot	NCBInr Human Database	16	WB	Up-regulated: chaperonin 60, GST, VDAC, ERp29, and cathepsin D
Kim et al 2016	PL	2T	Yes	LC-MS/MS Trans-Proteomic, V4.4 Sequest, V27	Swiss-Prot	168	ND	ND
Kolialexi et al 2017	P	1T	No	MALDI-TOF- MS/MS Mascot	Swiss-Prot	12	ELISA	Down-regulated: beta-2 glycoprotein 1, vitronectin, and haptoglobin
Kolla et al., 2012	P	1T	Yes	LC-MALDI-TOF- MS/MS Protein Pilot V2.0	Swiss-Prot	10	ND	ND
Kononikhin et al 2016	U	3T	No	LC-MS/MS Peaks de Novo. Mascot V2.0.0	Swiss-Prot V2015.10	35	ND	ND
Liu et al 2011	S	3T	Yes	LC-MS/MS BioWorks 3.3.1 Mascot	IPI human database	51	WB	Up-regulated: CSH and AHSG Down-regulated: TTR, Retinol-Binding Protein 4
Low et al 2013	UCB	3T	Yes	LC-MS/MS ProteinLynx V2.4	Swiss-Prot V2009	36	WB	Up-regulated: pigment epithelium-derived factor No statistical difference: alpha-fetoprotein, complement C5, complement factor H
Lu et al 2016	S	3T	Yes	LC-MS/MS BioWorks V3.3.1 Mascot	IPI human database V27	37	ELISA, IHC, qRT-PCR	Down-regulated: Retinol-Binding Protein 4
Ma et al 2014	CTB	3T	No	LC-MS/MS GPS-Mascot	NCBI- mammal database. V2007	60	WB	Down-regulated: Laminin
Mary et al 2017 (Clin Proteom)	PL	3T	Yes	LC-MS/MS Proein Lynx (PLGS), V2.4	Swiss-Prot	55	WB	Down-regulated: TINAGL1
Mary et al 2017 (J Proteome Res)	PL, P	PL: 3T P: 1T,2T,3T	Yes	LC-MS/MS Transomics Inf	Swiss-Prot	PL: 180 P: 41	WB, qRT-PCR	Up-regulated: Transferrin receptor-1
Mary et al 2017 (Cytoskeleton)	PL	3T	Yes	LC-MS/MS Protein Lynx (PLGS), V2.4	Swiss-Prot	2 (total 8 spots)	WB	Up-regulated: Vimentin
Myers et al 2013	P	2T	Yes	MALDI-TOF/TOF -MS/MS Mascot	Swiss-Prot	4	Immunoassay	Up-regulated: IGFALS Down-regulated: PlGF
Norwitz et al 2005	CSF	3T	No	SELDI-TOF -MS/MS Profound	Swiss-Prot	2	ELISA	Up-regulated: Hemoglobin
Pan et al 2015	UA	3T	No	LC-MS/MS MascotV2.2.1	Swiss-Prot	53	WB	Up-regulated: Aldose Reductase, Fibronectin 1, and Fibrillin-1
Park et al 2008a	AF	3T	No	SELDI-TOF- MS/MS Profound	NCBInr Human database.	2	WB	Up-regulated: Proapolipoprotein A-1 and Apolipoprotein A-1
Rasanen et al 2010	S	1T,3T	No	LC-MS/MS TurboSequest & XiTandem	Swiss-Prot	34	ELISA	Up-regulated: complement factor D, vascular cell adhesion protein 1, cystatin-C, and beta-2-microglobulin Down-regulated: pappalysin-1 Not significant: endoglin, VEGF, fibronectin, and sFlt-1
Shi et al 2013	PL	3T	No	LC-MS/MS Mascot V2.2.04	NCBInr Human database.	26	WB, IHC	Down-regulated: HSPE1,PRDX3, TFRC
Shin et al 2011	PL	3T	No	MALDI-TOF- MS/MS MS-fit	Swiss-Prot & NCBInr human database	12	WB, IHC	Up-regulated: Heat Shock Protein 27
Sun et al 2007	CTB	3T	No	MALDI-TOF- MS/MS MS-fit	Swiss-Prot	7	ND	ND
van den Berg et al 2017	CSF	3T	No	LC-MS/MS Mascot V2	Swiss-Prot	25	ELISA	Up-regulated (in EOPE but not LOPE): AMBP, alpha-1-microglobulin Undetectable using ELISA: HbF
Vascotto et al 2007	AF	2T	No	MALDI-TOF MS/MS LC-MS/MS ProFound	NCBInr Human database	1	IHC	Increased: transthyretin
Wang et al 2007	P,PL	3T	Yes	LC-MS/MS, Mascot	Not stated	2	ELISA, WB, IHC	Down-regulated: H-ficolin, L-ficolin, No statistical difference: Mannose-Binding Lectin
Wang et al 2013	PPM	3T	No	LC-MS/MS Maxquant V1.2.2.5	Swiss-Prot V20120418	43	IHC	Up-regulated: ENG
Webster et al 2007	PL	3T	No	LC-MS/MS Mascot	Not stated	7	WB, IHC	Up-regulated: Heat Shock Protein 27, EMAP II, Gp96, catalase
Yang et al 2015	PL	3T	No	MALDI-TOF- MS Mascot	NCBInr human database	20	WB	Up-regulated: Heat Shock Protein 27 Down-regulated: Heat Shock Protein 70
Zhang et al 2011	PL	3T	No	MALDI-TOF- MS Mascot	NCBInr human database	19	WB	Down-regulated: Nitric Oxide Synthase 3, Heat Shock Protein90
Abbreviations
Samples - 1T:first trimester (11-14 weeks), 2T:second trimester (14-26 weeks), 3T:third trimester (>26 weks), AF: amniotic fluid, CTB: cytotrophoblast cells, P: plasma, PL: placenta, PPM: placenta plasma membrane, S: serum, UCB:umbilical cord blood, U:urine, UA:Umbilical artery,
Method - CE: Capillary Electrophoresis, DIGE:Difference gel electrophoresis, ELISA: enzyme linked immunosorbent assays, IHC: Immunohistochemistry, LC: liquid Chormotography, MALDI-TOF: matrix-assisted laser desorption ionization time-of-flight mass spectrometry, MS: mass spectrometry, qRT-PCR: Real-time polymerase chain reaction, WB: western blotting
ND: Not available determined

## Sheet: STable 1.1(incomplete)
Reference	Method	Sample	Time of collection	Gestation matched control	Included mothers that smoked during pregnancy	Number of patients	BMI	Mode of delivery	Maternal age	Gestational age at delivery (weeks)	Birth weight	Ethnicity	Country	Overall Quality Assessment
Atkinson et al 2009a	2DE, DIGE	S	3T	Yes	NR	2DE cohort NP n=12 PE n=12 DIGE Cohort NP n=12 PE n=12	2DE cohort NP: 23.2 (4.4) PE: 26.4 (4.1) DIGE Cohort NP: 25.2 (5.1) PE: 26.8 (4.0)	NR	2DE cohort NP: 31.8 (3.4) PE: 31.4 (4.2) DIGE Cohort NP: 31.6 (3.6) PE: 30.2 (5.0)	2DE cohort NP: 40.1 (1.5) PE: 38.1 (0.6) DIGE Cohort NP: 40.2 (1.4) PE: 37.8 (0.8)	2DE cohort NP: 3,628 (329) PE: 2,943 (340) * DIGE Cohort NP: 3,671 (399) PE: 3,107 (333) *	Caucasian, Maori or Pacific Islander, Other	New Zealand	10
Auer et al 2010	iTRAQ	Pl	3T	No	NR	NP: n=6 PE: n=7 FGR: n=7 PE with FGR: n=7	NR	NR	NP: 32.90 ± 6.58 PE: 34.00 ± 6.95 PE with FGR: 32.57 ± 4.20 FGR: 30.21 ± 2.93	NP: 37.87 ± 3.58 PE: 32.61 ± 2.95 PE with FGR: 32.87 ± 1.25 FGR: 34.02 ± 1.85	NP: 3,352.86+421.31 PE: 1,734.29+618.43 PE with FGR: 1,338.57+270.0 FGR: 1,755.00+639.44	Caucasian	France	7
Baig et al 2014a	1D Gel-LC-MS/MS	STB	3T	Yes	NR	NP n=6 PE n=3	NR	CS	NP 36.33[5.28] PE 31.[2.16]	NP 36.38(1.56) PE 36.06(0.95)	NP 2,722.5 [434.79] PE 2,658 [792.02]	NR	Singapore	9
Blumenstein et al 2009 (Proteomics)a	LC-MS/MS	P	2T	No	Yes	NP n=57 PE AGA n=27 PE SGA n=12	NP 24.5 (3.2) PE AGA 26.0 (3.5) PE SGA 28.8 (6.6)*	CS	NP 29.7 (4.9) PE AGA 30.0 (4.5) PE SGA 30.3 (5.6)	NP 40.2 (1.4) PE AGA 38.1 (2.3) PE SGA 35.4 (3.1)	NP 3,620 (449) PE AGA 3,207 (596) PE SGA 1,994 (533) *	Caucasian, Maori/pacific islander, Chinese, Indian, Other		8
Blumenstein et al 2009 (Reproductive Sciences)a	DIGE, LC-MS/MS	P	2T,3T			NP: 6 PE: 6	NR	NR	NP: 30.7 (2.9) PE: 31.7 (1.8)	NP: 40.8 (0.8) PE: 36.2 (1.8)	NP: 3,760 (441) PE: 2,728 (734)			10
Carty et al 2011	MS, LC-MSE	U	1T,3T	Yes	Yes	NP n=2340 PE n=45	NP: 26 ± 5 PE: 29 ± 5	VD and CS	No PE: 30 ± 6 PE: 29 ± 5	No PE: 39.7 ± 1.8 PE: 38.3 ± 2.0	NP: 3,443 ± 565 PE: 3,155 ± 621	Caucasian, Other		10
Cecconi et al 2011	2-DE, nanoHPLC-Chip/MS	UCB, AF	3T	Yes	NR	NP n=10 FGR n=10	NR	CS	NR, matched	NR, Full term deliveries	NR	Caucasian	Italian	9
Centlow et al., 2010	2D-PAGE	Pl	3T	Yes		NP n=30 PE n=30			NP 32 (23–44) PE 30 (22–45)	NP 38.42 (34.57–42.14) PE 37.86 (33.57–41.00)	NP 3,671±297 PE 3,219 ± 571			8
Chen et al 2011a	iTRAQ, 2-DE, LC-MS/MS	U	NR	No	NR	NP n=10 PE n=10	NP 26.56 ± 3.09 PE 27.34 ± 4.34	NR	NP 25.90 ± 1.66 PE 28.60 ± 3.41	Normal pregnancy 39.43 ± 2.86 PE 36.21 ± 2.34	NP 3,532.00 ± 321.59 PE 2,492.22 ± 540.13*	Asian	China	7
Dai et al 2017	LC-MS/MS	S	3T	Yes	NR	NP n=3 PE n=3	NP: 24, 27, 28 PE: 24, 29, 28	NR	NP: 29, 27,26 PE: 28, 31, 20	NP: 31 (28 - 33) PE: 31 (28 - 33)	NR	Asian	China	7
de Groot et al 2007	MALDI-TOF MS	TRB	3T	No	NR	NP n=7 EOPE n=3 LOPE n=7	NR	CS,VD	NP 29.29 (22-33) EOPE 31 (22-33) LOPE 24 (20-26)	NP 38.71 EOPE 32.39 LOPE 38.00	NP 3,174.29 EOPE 1,434.5 LOPE 2,656	Caucasian	Netherlands	6
Dexlin-Mellby et al 2010	recombinant antibody microarrays	Pl	3T	No	NR	NP n=11 EOPE n=7 LOPE n=12 PE and FGR n=6			NP: 30 (22–40) EOPE: 28 (22–43) LOPE: 29 (23–39) PE and FGR: 33 (21–40)	NP: 40.00 EOPE: 33.57 LOPE: 39.00 PE and FGR: 33.42	NR	Caucasian	Swweden	7
Epiney et al 2012	LC-ESI-MS/MS	CTB	3T	No		NP n=6 sPE n=4	NP 29±1.8 sPE 26.5±4.2		NP 33.2±2.6 sPE 38.8±2.3	NP 38.5±0.6 sPE 29±1.3 *	NP: 3,310±337 sPE: 1,153±320*			8
Erez et al 2017	Aptamers-based proteomics technique	P	1T,2T,3T	Yes	Yes	NP: n= 90 LOPE: n= 76 Mild LOPE: n= 48 Severe LOPE: n=28	NP: 26.5 (22.8–33.2) LOPE: 30.0 (24.8–36.2) Mild LOPE:28.4 (24.0–33.0) Severe LOPE: 32.5 (27.2–38.7)		NP: 24 (21.0–27.8) LOPE: 22 (20.0–29.0) Mild LOPE: 22.5 (20.0–28.3) Severe LOPE: 22 (19.0–29.3)	NP: 39.4 (39.0–40.4) LOPE: 38.7 (37.7–39.4) Mild LOPE:38.8 (37.7–39.4) Severe LOPE: 38.6 (37.7–39.5)				7
Feng et al 2012	MALDI-TOF-MS	S	3T	No		NP n=30 EOPE n=30 LOPE n=30	NP n=30 EOPE n=30 LOPE n=30	CS	NP 29 (22-33) EOPE 31 (23-34) LOPE 27 (24-31)	NP 38.35 (37+2 - 39+6)b EOPE 30.42 (28+1 - 33+4)b LOPE 37.86 (35+6 - 39+2)b				9
Gharesi-Fard et al 2010	2D-PAGE, MALDI TOF/TOF	Pl	3T	NS		NP: n=5 sPE n=5		CS	NP: 24.1 ± 3 PE: 24.3 ± 2.4	NP: 37.1 ± 1.1 PE: 35.9 ± 0.8				8
Jia et al 2015a	LC-MS/MS	UCB	3T	No	NR	NP n=10 PE n=10	NR	CS	NP 26.9 ± 4.8 PE 25.3 ± 5.3	NP 38.6 ± 5.5 PE 34.3 ± 4.6	NP 3,074.9 ± 131.3 PE 2,705.8 ± 121.0 *	NR	NR	7
Jin et al 2008b	LC–MS/MS, 2DE, MS	CTB	3T	Yes	NR	PE n=8	NR	CS	NR. Matched	NR. Matched	NR			7
Jin et al 2017	2D LC-MS/MS	CTB	3T	Yes	ND	NP n=20 PE: n=20	NP: 24.6 (22.3–30.1) PE: 27.3 (25.6–31.3)	CS	NP: 32 (28–34) PE: 32 (29–33)	NP: 32.1 (28.1–35.2)b PE: 31.5 (28.2–33.4)b	NR			9
Johnstone et al 2011	2-DE, MS, WB	P	3T	No	No	NP n=5 PE n=5		CS and VD	NR	NP: 39.0 ± 1.2 PE: 36.8 ± 2.6	NP: 3,367 ± 362.6 PE: 2,729 ± 610.7			7
Karamessinis et al 2008	2DE, MS	UCB	3T	Yes	Yes	NP n=10 FGR n=10 (4 with PE)	NR	CS, VD	NP: 29 ± 5 FGR: 29 ± 3	NP: 38.6 ± 1.2 FGR: 38.5 ± 1.33	NP: 3,276 ± 356 FGR: 2,359 ± 197*	Caucasian	Greece	9
Kim 2016	LC/MS, MRM-MS	Pl	2T	Yes	NR	NP n=13 PE n=13	NP: 22.6 (19.2-29.1) PE:22.2 (18.5-25.2)		NP: 39.3 (37.6-40.7) PE: 37 (29.3-39.3)	NP 39.3 (37.6-40.7) PE 37 (29.3-39.3)*	NP: 3,310(3,000-3,830) PE:2,600 (840-3410)*	Asian	Korean	6
Kim et al 2007	2-DE, MALDI-TOF MS/MS, WB	P	3T	No		NP n=8 PE n=8	NR	CS, VD	NP: 29.0 ± 2.3 PE: 31.5 ± 4.3	NP: 36.6 ± 3.4 PE: 33.6 ± 3.3	NR (4 out of 8 PE cases had FGR)			9
Kolialexi et al 2017b	2-DE, MALDI-TOF MS/MS, ELISA	P	1T	Yes	Yes	NP n=40 EOPE n=10	NP: 24.8 (22.5–26.2) EOPE: 27.9 (23.4–32.9)	NR	NP: 32.2 (28.8–37.3) PE: 32.9 (27.3–35.0)	NP: 40.2 (39.0–41.5) EOPE: 32.8 (31.5–33.8)	NP: 3,350 (3,200–3,700) EOPE: 1,350 (1,040–1,590)	Caucasian	Greece	8
Kolla et al., 2012	iTRAQ	P	1T	No		NP n=6 PE n=6			NP: 35.1±1.3 PE: 35.1±6.8	NP: 38.8±0.8 PE: 34.9±2.4		Caucasian	Switzerland	6
Kononikhin et al 2016	LC-MS/MS	U	3T	No	NR	NP n= 10 MPE n= 10 SPE n= 10	NR	CS, VD	Age between 18 and 40.	NP: 38,5(37,9-39,1) mPE: 38.1(37.5-39) sPE: 35,1(34.5-37.6)*	NP: 3,325(2,967-3,542) mPE: 3,070(2,645-3,590) sPE: 2,393(1,947-3,083)	Caucasian	Russia	10
Liu et al 2011	1D-Gel-LC-MS/MS	S	3T	Yes		NP n=5 PE n=5		CS	NP 28.2±1.8 PE 30.3±2.4	NP 38.6 ± 0.4 PE 36.4 ± 1.2				7
Low et al 2013	NanoUPLC-MSE	UCB	3T	NR		NP n=3 PE n=3			Insufficient data, all patients >18 years old	NR				10
Lu et al 2016	PLLB, LC-MS/MS	S	3T	Yes	NR	NP n=10 SPE n=10	NR	CS and VD	NP: 27.1 ± 2.6 sPE: 27.3 ± 3.4	NP: 38.5 ± 0.9 sPE: 36.4 ± 1.6		Asian	China	6
Ma et al 2014	2D LC–MS/MS, LCM	CTB	3T	Yes	NR	NPl n=1 sPE n=1	NR	CS	NR. Matched	NR. Matched	NR	Asian	China	8
Mary et al 2017 (J Proteome Res)	2-DGE, WB	Pl | P	1T,2T,3T | 3T	Yes	NR	NP n=25 PE n=25	NP: 25.5 PE: 27	NR	NP: 24.08 ± 3.92 PE: 23.44 ± 2.69	NP: 39.25 ± 1.15 PE: 38.46 ± 1.38	NR		India	10
Mary et al 2017 (Cytoskeleton)	2-DGE, Nano LC-MSE , WB	Pl	3T	NR	NR	NP n=6 PE n=6	NR	NR	NR	NR	NR		India	7
Mary et al 2017 (Clin Proteom)	2-DGE	Pl	3T	NR	NR	NP n=25 PE n=25	NR	NR	NR	NR	NR		India	8
Miao et al 2014a	TMTs	Pl	3T	Yes		NP n=10 FGR n=10	NP: 25.06 ± 2.96 FGR: 25.73 ± 2.62	CS, VD	NP: 28.20 ± 3.41 FGR: 26.30 ± 2.41	NP: 38.64 ± 1.06 FGR: 37.62 ± 2.20	NP: 3,305.00 ± 338.67 FGR: 1,949.00 ± 325.93 *	Asian	China	10
Myers et al 2013	MS, ELISA	P	2T	Yes	Yes	NP n=222 PE n=26	Set 1 (Training set): NP: 25.8 (21.8–28.2) PE:28.3 (23.1–31.3) Set 2 (Validation set): NP: 24.9 (21.6–27.4) PE: 27.2 (23.2–29.5)	NR	Set 1 (Training set): NP: 26.8 (6.4) PE: 26.6 (6.0) Set 2 (Validation set): Contorl: 28.9 (5.3) PE: 29.7 (5.5)	Set 1 (Training set): NP: 39.8 (1.9) PE: 37.7 (2.6) Set 2 (Validation set): Contorl: 39.9 (1.9) PE: 38.2 (3.1)	NR	White, Other	UK	9
Norwitz et al 2005b	2-D 1 MALDI-TOF, ELISA, WB	CSF	3T	Yes	NR	NP n=8 sPE n=7 mPE n=8	NR	NR	NP: 34.1 [31.4-36.9] sPE: 36.7 [33.6-37.8] mPE: 35.6 [34.4-36.8]	NP: 36.0 [33.3-38.7] sPE: 33.7 [31.7-35.7] mPE: 34.1 [31.1-37.1]	NR	NR	USA	8
Pan et al 2015	iTRAQ, 2D-LC–MS/MS, WB	UA	3T	Yes	NR	NP n=3 PE n=3	NR	CS	NP 27.33 PE 27	NP 39.33 PE 38.67	NP: 3,570.00 PE: 3,466.67	Asian	China	10
Park et al 2008a	LC	AF	3T	Yes		NP n=16 PE n=18		CS	NP: 31.6 ± 3.0 PE: 32.5 ± 4.7	NP: 36.0 ± 3.2 PE: 36.1 ± 3.6	NP: 2,683 ± 554 PE: 2,403 ± 1003	Asian	Korea	9
Rasanen 2010	ELISA, MS, 2D-LC MS	S	1T,3T	No	Yes	Preclinical PE Cohort NP n=70 mPE n=30 sPE n=40 Clinical PE Cohort NP n= 58 mPE n=30 sPE n=30	NR		Preclinical PE Cohort NP 29.4 (18.4-41.8) mPE 25.4 (19.2-38.2) sPE 28.8 (18.8-41.2)* Clinical PE Cohort NP 27.3 (19.2-34.9) mPE 28.3 (19.2-39.4) sPE 27.8 (19.9-38.6)	Preclinical PE Cohort NP 40.2 (37.0-42.9) mPE 39.6 (28.9-42.0) sPE 33.2 (27.8-38.9)* Clinical PE Cohort NP 40.1 (36.7-42.3) mPE 39.1 (33.0-42.0) sPE 35.7 (22.1-36.0)*	Preclinical PE Cohort NP 3,540 (2,884-4,560) mPE 3,182 (990-4345) sPE 2,052 (885-3520)* Clinical PE Cohort NP 3,440 (2,530-4,488) mPE 3,160 (1,990-4,345) sPE 2,240 (315-3480)*			6
Shi et al 2013	iTRAQ, LC-MS/MS	Pl	3T	Yes	No	NP n=5 PE n=4		CS	NP: 26.5 ± 3.1 PE: 27.5 ± 3.1	NP: 38.3 ± 2.3 PE: 37.2 ± 1.1	NP: 3,067 ± 728 PE: 2,671 ± 389			9
Shin et al 2011b	2-DE, MALDI-TOF-MS	Pl	3T	Yes	NR	NP n=10 PE n=10	NR	CS	NP 28 (26–32) PE 25 (21–38)	NP 38.2 (37.5–38.8) PE 36.2 (35.0–40)	NP 3,070 (2,810–3,430) PE 2,345 (1,220–3,390)			9
Van de Berg et al 2017b	LC–MS/MS	CSF	3T	No	Yes	NP n=48 PE n=43	NP:23.8 (21.1–29.1) PE: 25.5 (21.6–29.4)	CS	NP: 34 (31–36) PE: 32 (29–36)	NP: 38.57 (37.71–38.86) PE: 30.71 (28.00–33.86)	NP: 3,390 (2875–3690) PE: 1,190 (900–1860)	Western and Non-Western		7
Vascotto et al 2007	MALDI-TOF-MS	AF	2T	No	NR	NP n=5 PE n=5	NR	control had spontaneous delivery, sPE had CS	NP: 35 PE: 33.8	NP: 39.74 PE: 32.23	NR		Italy	6
Wang et al 2007	2D-PAGE, ELISA	P,Pl	3T	Yes		NP n=11 PE n=11	NP: 25.7 PE: 26.8	VD and CS	NP: 29.18 (3.57) PE: 31.55 (5.54)	NP: 39.94 (1.27) PE: 36.16 (3.50)				7
Wang et al 2013c	LC-MS/MS	PPM	3T			NP n=20 PE: n=20	NR		NP: 25.9 ± 2.7c PE: 26.1 ± 3.1c	NP: 38.3 ± 2.8 c PE: 34.1 ± 3.2c	NP: 3,024 ± 786 c PE: 3,024 ± 786c			6
Webster et al 2007	2-D 1 MALDI-TOF, IHC, WB	Pl	3T	No		NP n=6 sPE n=6	NR	VD and CS	NP: 26 ± 5.2 sPE: 29.7 ± 8.1	NP:38.6 ± 0.7 sPE: 29.6 ± 2.9	NP: 3,361 ± 289.3 sPE: 1,109 ± 514.1 *			9
Wolter et al 2016	MALDI-TOF	S	3T	Yes	Yes	NP n=15 FGR n=15	NP: 23.7 (20.8–26.6) FGR: 24.2 (22.4–26.1)		NP: 31.7 (28.3–33.9) FGR: 30.4 (26.9–34.0)	NP: 32.8 (30.2–35.3) FGR: 33.0 (30.5–35.5)	NP: 2,129 (1,584–2,673) FGR: 1,318 (1,005–1,761)	Caucasian	Germany	10
Yang et al 2015	2DE, MALDI-TOF-MS	Pl	3T	Yes (NS because small n number. 3 gestational weeks apart)		NP n=5 PE n=5	NR	All CS	NP: 31.7 ± 3.9 PE: 31.8 ± 5.0	NP: 37.4 ± 1.4 PE: 35.6 ± 2.3	NP: 3,193 ± 594 PE: 2,258 ± 325			10
Zhang et al 2011a	2D-DIGE	Pl	3T	No	No	NP n=6 PE n=6	NR	VD and CS	Healthy pregnant: 26.6 (2.7)a PE: 27.1 (2.8)a	NP: 40 ± 1 PE: 34 ± 6 *	NR	White, Black, Other		10
Samples - 1T:first trimester (11-14 weeks), 2T:second trimester (14-26 weeks), 3T:third trimester (>26 weks), S: serum, P:plasma, Pl:placenta, PPM: placenta plasma membrane, CTB: cytotrophoblast cells, UCB:umbilical cord blood, U:urine, UA:Umbilical artery, AF:amniotic fluid
Method - 2DE: two-dimensional gel electrophoresis, DIGE:Difference gel electrophoresis, iTRAQ:Isobaric tags for relative and absolute quantitation, MALDI: Matrix Assisted Laser Desorption/Ionization, MS:mass spectrometry, MRM:ultiple reaction monitoring, WB: western blotting, NanoUPLC: Nano Ultra performance liquid chromatography, LCM: laser capture microdissection, LC: liquid Chormotography, PLL…
NP: Normal pregnancies, NR: Not reported
a- values are mean with SD
b- values are men with IQR
c- values are mean with SEM
